# Supplementary material for: TMEM97/Sigma 2 Receptor Increases Estrogen Receptor α Activity in Promoting Breast Cancer Cell Growth
Source: MDPI journal article supplement (doi:10.3390/cancers15235691), 2023-12-02
Supplement: s1 [file s1]

# TMEM97/Sigma 2 Receptor Increases Estrogen Receptor $\alpha$ Activity in Promoting Breast Cancer Cell Growth

Yuanqin Zhang, Xiangwei Fang, Jiuhui Wang and Daotai Nie

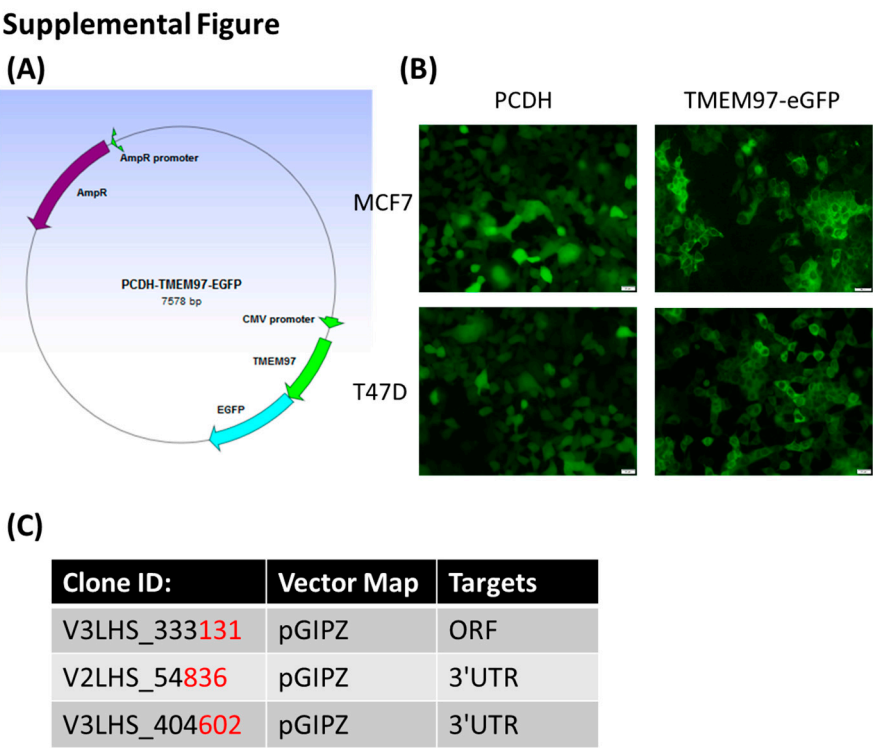

**Supplemental Figure S1**

(A). The plasmid map of TMEM97-EGFP on PCDH-CMV vector to generate TMEM97 stable overexpression breast cancer cells.

(B). Visualization of TMEM97eGFP cells in MCF7 and T47D compared to vector control.

(C). Commercial modified miR-30 based GIPZ Lentiviral shRNA used for TMEM97 knockdown.

**Figure 2**  
(A)

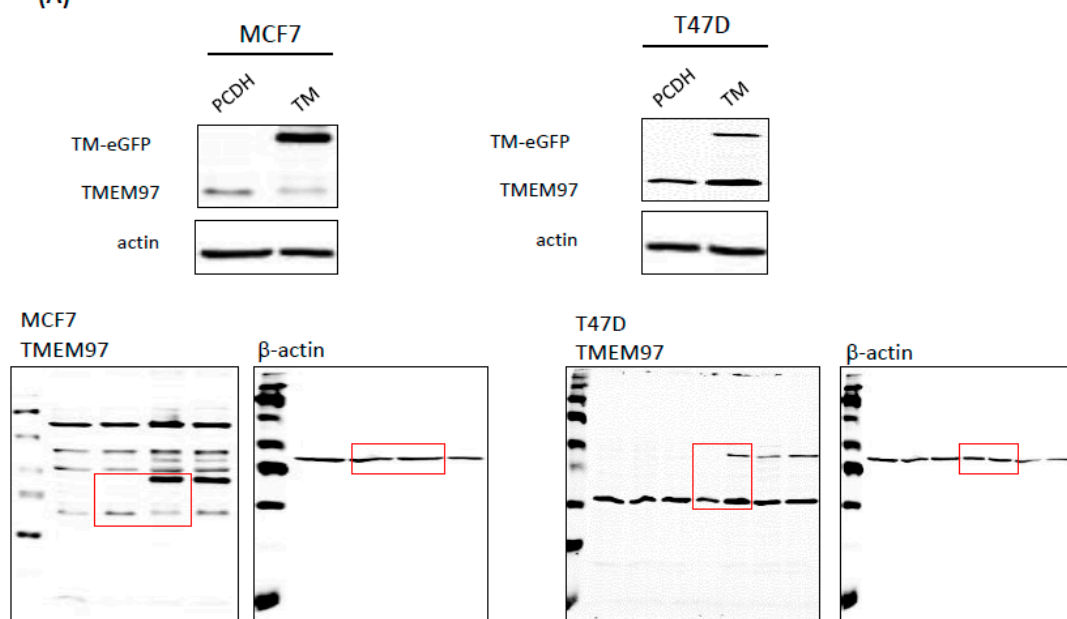

Original blots of Figure 2.  
(A)

**Figure 4**

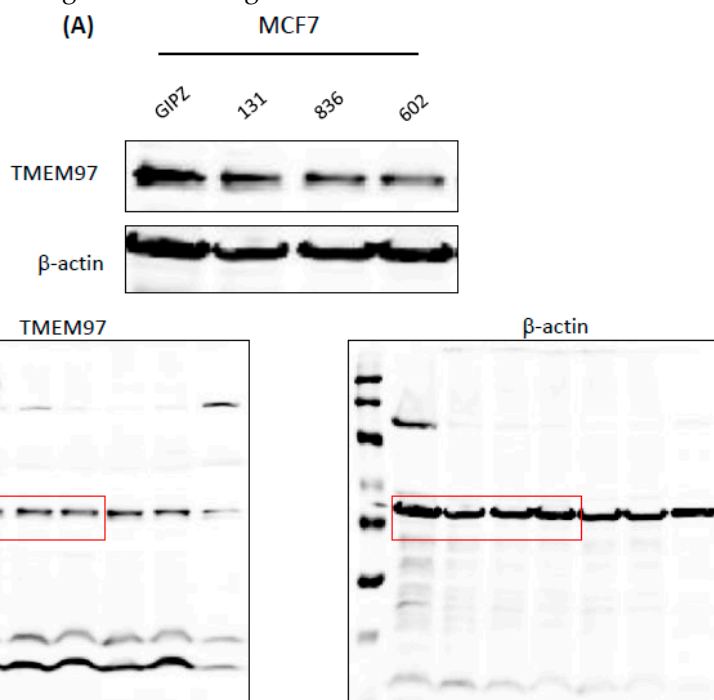

Original blots of Figure 4.

Figure 6

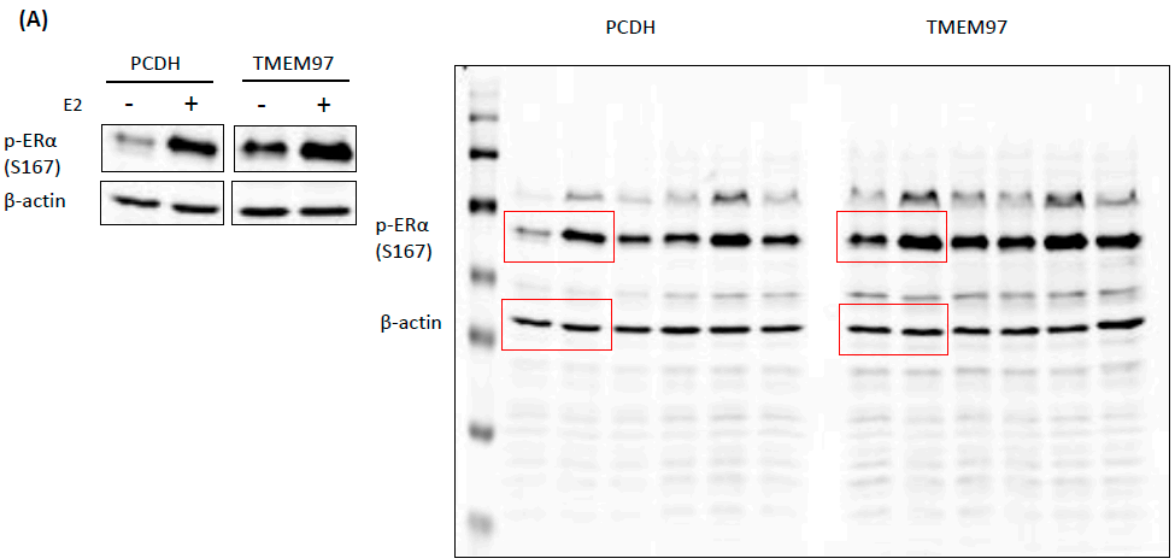

Figure 6

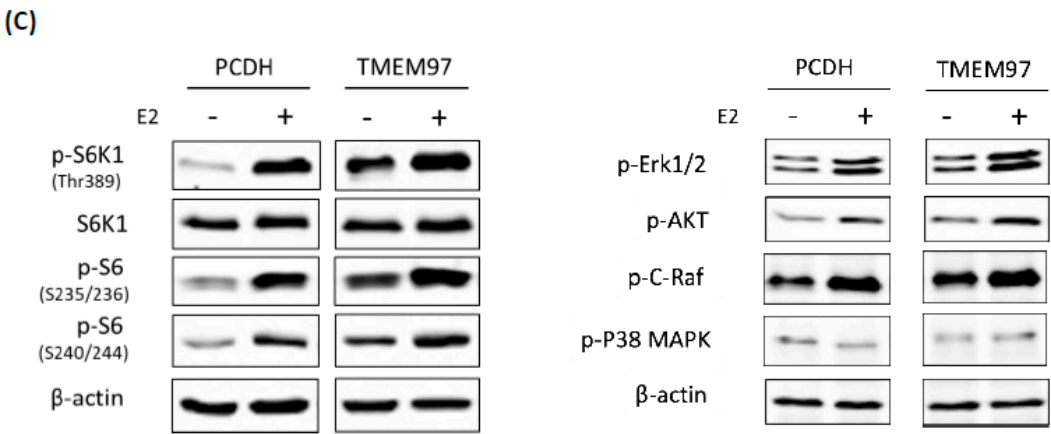

Figure 6

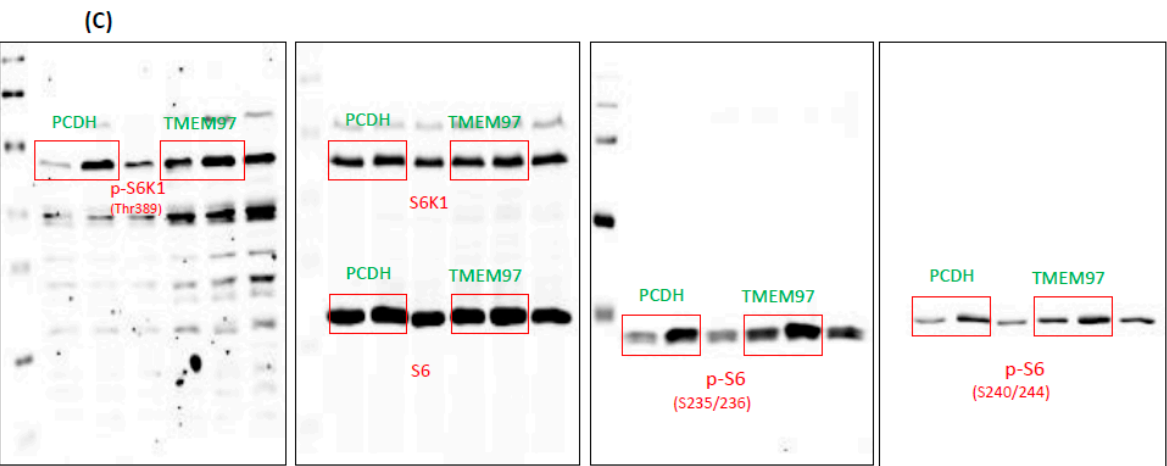

Figure 6

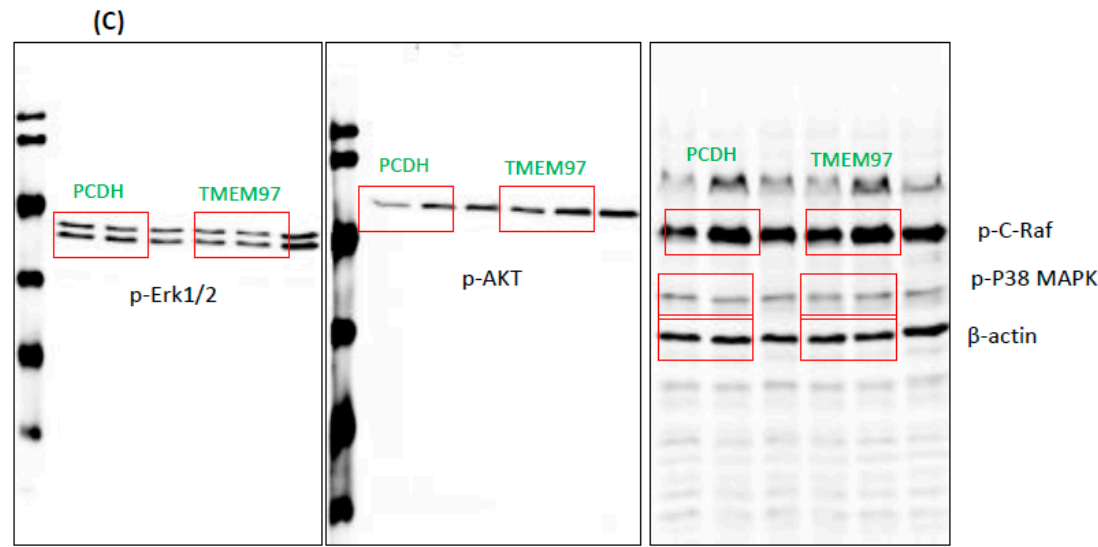

Figure 6

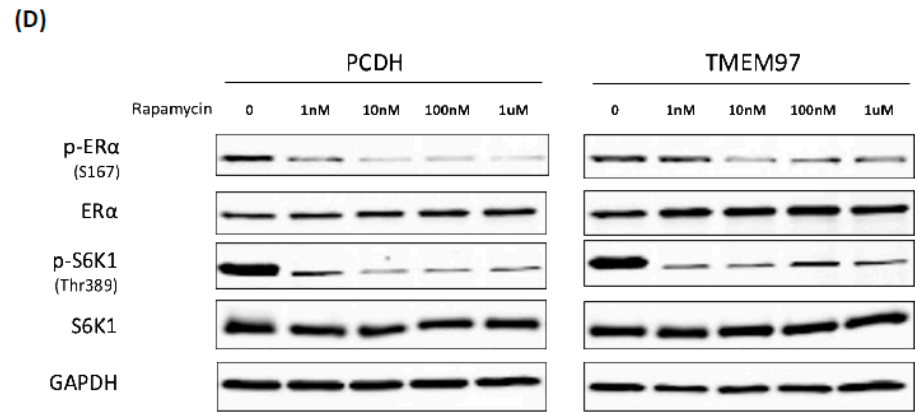

Figure 6

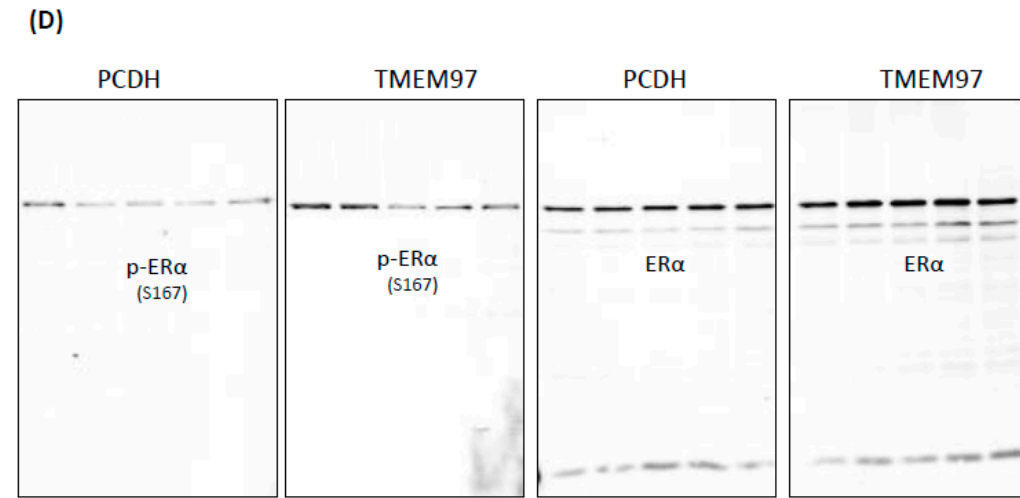

Figure 6 (D)

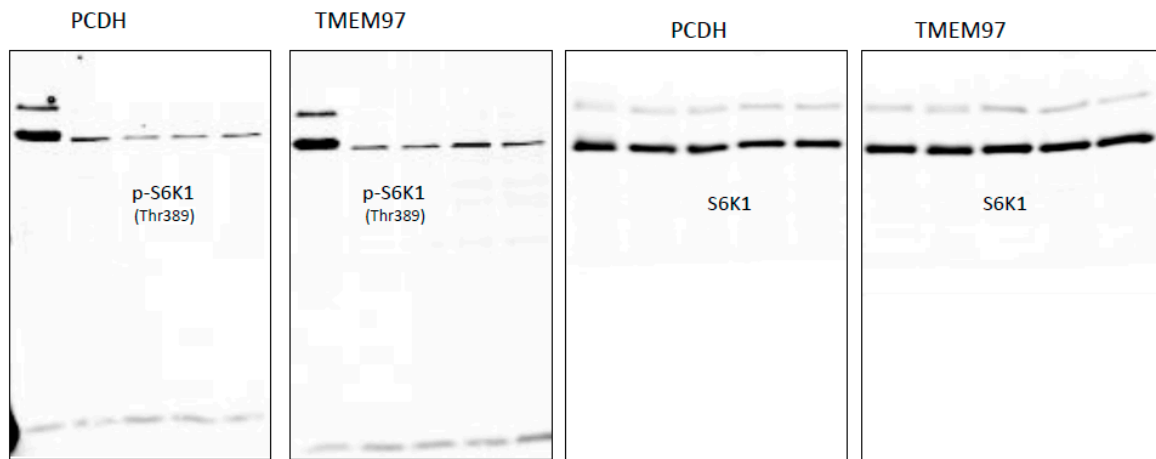

Figure 6 (D)

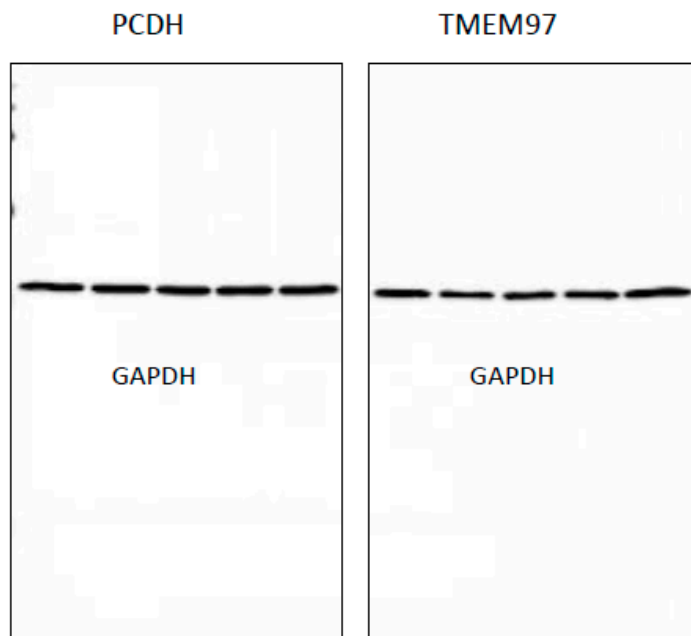

Original blots of Figure 6.

Figure 7

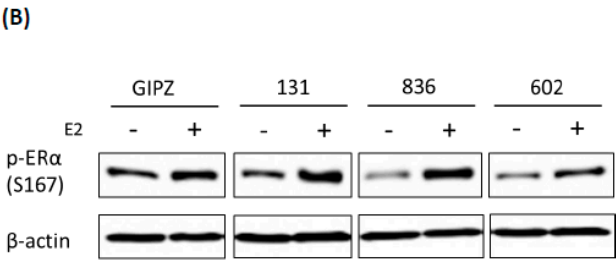

Figure 7 (B)

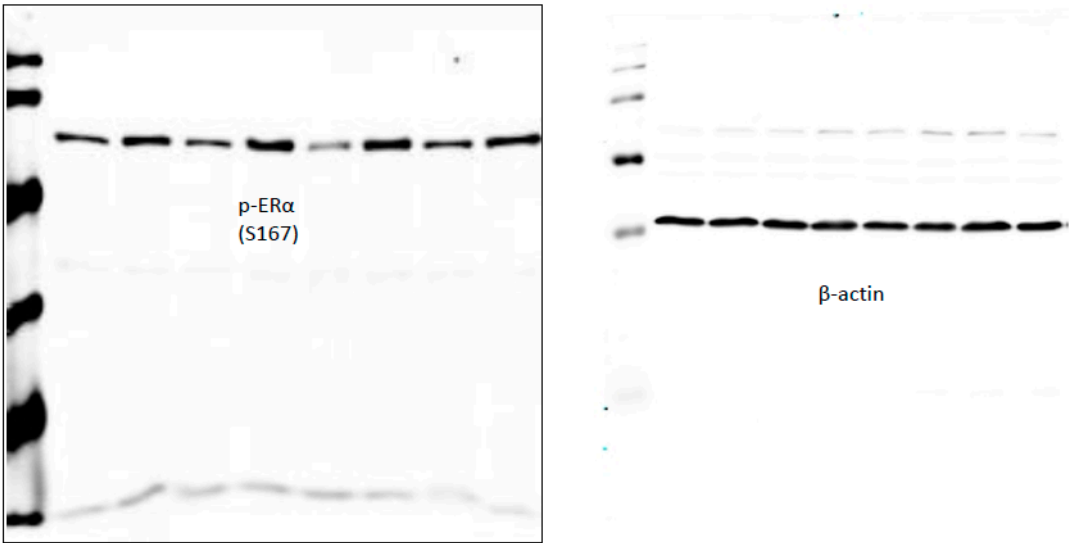

Figure 7

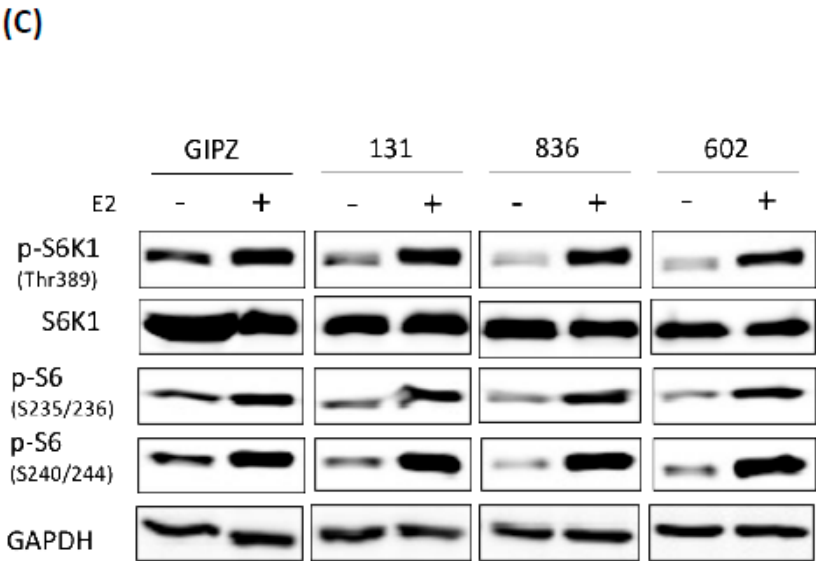

Figure 7 (C)

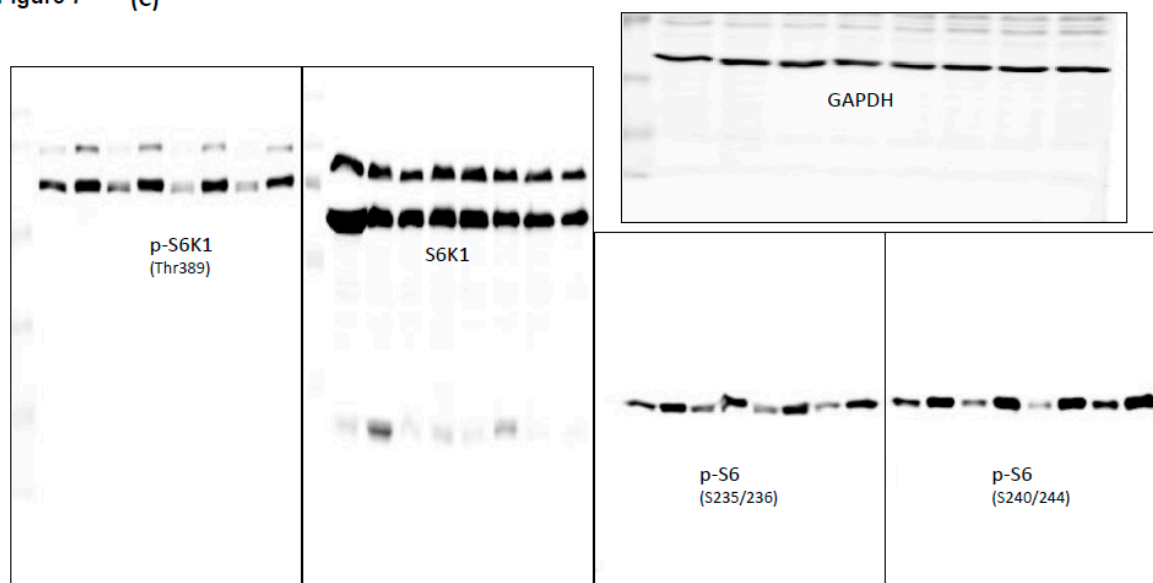

Original blots of Figure 7.
